# Supplementary material
Source: Research Square preprint supplement (doi:10.21203/rs.3.rs-9156999/v1)
Supplement: Supplementary file 1 [file f7fcfc90addb68f585783181.docx]

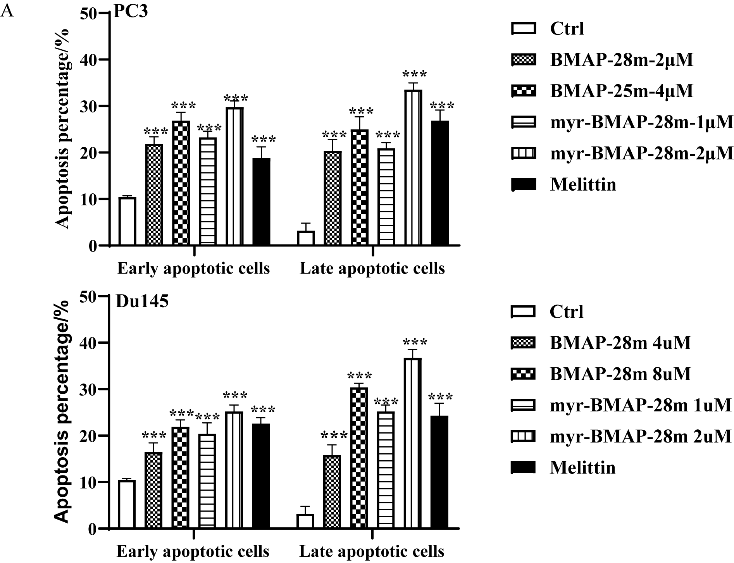


Supplementary figure 1

A Statistical analysis of cell apoptosis after treatment of PC3 and Du145 cells with BMAP-28m and myr-BMAP-28m (n=15)


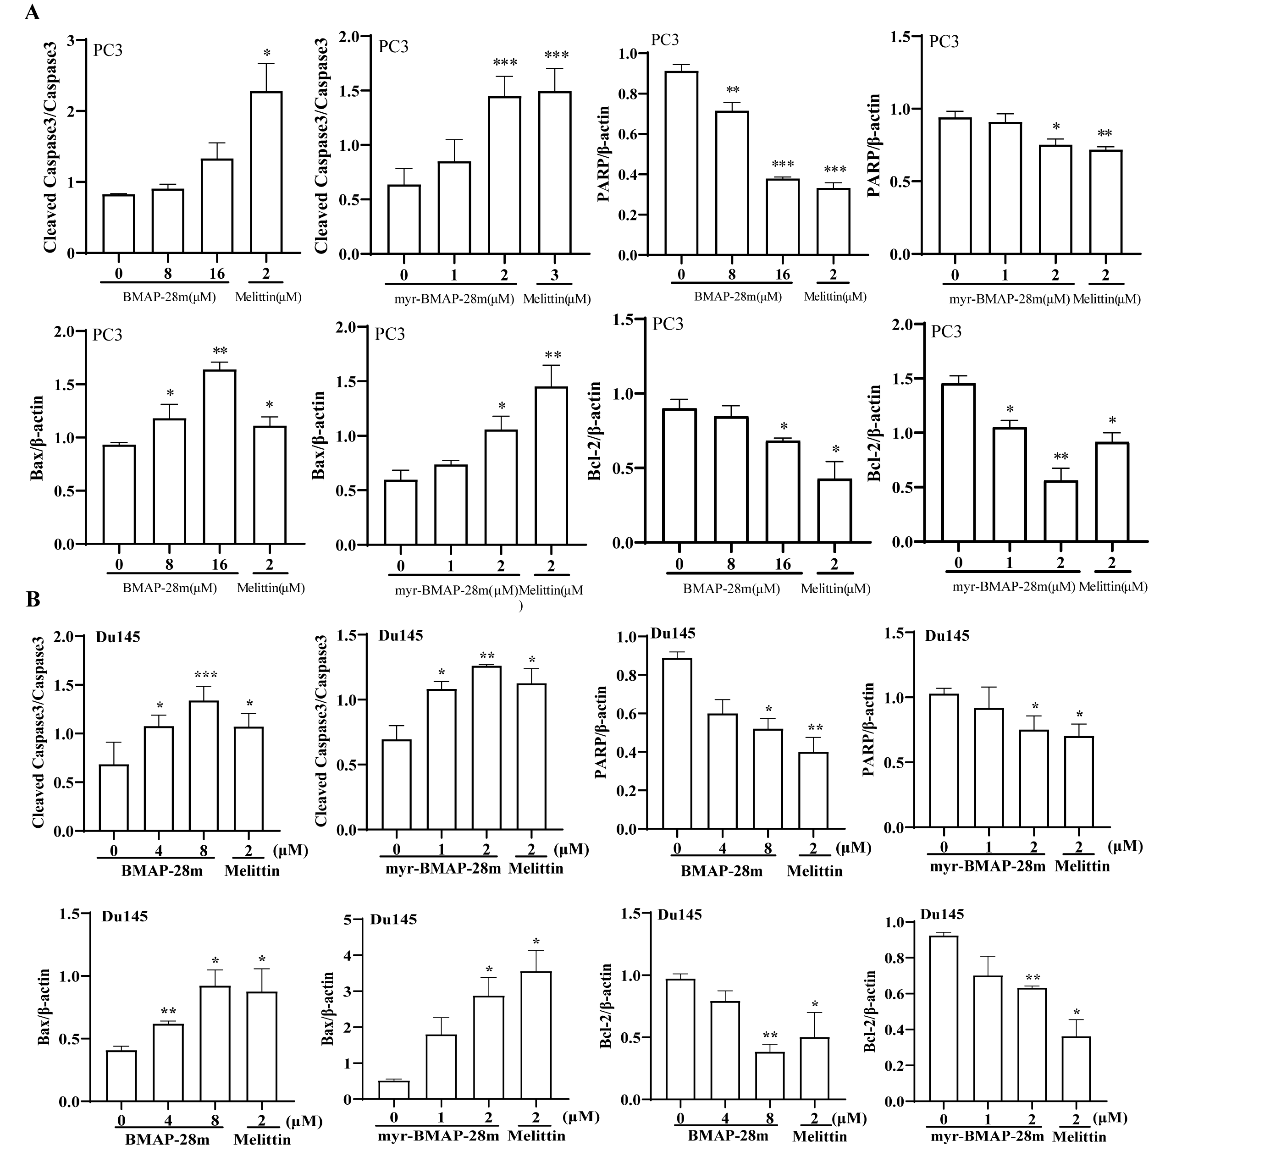


Supplementary figure 2

A-B Statistical analysis of the expression levels of apoptosis-related proteins in PC3 and Du145 cells after treatment with BMAP-28m and myr-BMAP-28m (n=3)
